# Supplementary material for: Novel Tick-Borne Anaplasmataceae Genotypes in Tropical Birds from the Brazilian Pantanal Wetland
Source: MDPI journal article supplement (doi:10.3390/microorganisms12050962), 2024-05-10
Supplement: s1 [file s1]

**Table S1.** Number of avian species collected in Pantanal wetland in the states of Mato Grosso and Mato Grosso do Sul, central-western Brazil.

| Scientific name                       | Common name                   | Number of sampled birds |
|---------------------------------------|-------------------------------|-------------------------|
| <i>Agelaioides badius</i>             | Grayish baywing               | 5                       |
| <i>Agelasticus cyanopus</i>           | Unicolored blackbird          | 3                       |
| <i>Antilophia galeata</i>             | Helmeted manakin              | 1                       |
| <i>Arremon flavirostris</i>           | Saffron-billed sparrow        | 7                       |
| <i>Arundinicola leucocephala</i>      | White-headed marsh tyrant     | 4                       |
| <i>Basileuterus flaveolus</i>         | Flavescent warbler            | 23                      |
| <i>Basileuterus hypoleucus</i>        | White-bellied warbler         | 4                       |
| <i>Cacicus cela</i>                   | Yellow-rumped cacique         | 10                      |
| <i>Cacicus solitarius</i>             | Solitary cacique              | 2                       |
| <i>Campylorhynchus turdinus</i>       | Thrush-like wren              | 2                       |
| <i>Cantorchilus leucotis</i>          | Buff-breasted wren            | 6                       |
| <i>Casiornis rufus</i>                | Rufous casiornis              | 1                       |
| <i>Cercomacra melanaria</i>           | Mato grosso antbird           | 9                       |
| <i>Certhiaxis cinnamomeus</i>         | Yellow-chinned spine tail     | 18                      |
| <i>Cnemotriccus fuscatus</i>          | Fuscou flycatcher             | 5                       |
| <i>Coereba flaveola</i>               | Bananaquit                    | 4                       |
| <i>Conirostrum speciosum</i>          | Chesnut-vented conebill       | 1                       |
| <i>Coryphospingus cucullatus</i>      | Red-crested finch             | 1                       |
| <i>Cranioleuca vulpina</i>            | Rusty-backed spinetail        | 3                       |
| <i>Cyanocorax chrysops</i>            | Plush-crested jay             | 1                       |
| <i>Cyanocorax cyanomelas</i>          | Purplish jay                  | 3                       |
| <i>Cyclarhis gujanensis</i>           | Rufous-browed peppershrike    | 1                       |
| <i>Dendroplex picus</i>               | Straight-billed woodcreeper   | 6                       |
| <i>Donacobius atricapilla</i>         | Black-capped donacobius       | 5                       |
| <i>Elaenia albiceps</i>               | White-crested elaenia         | 2                       |
| <i>Elaenia spectabilis</i>            | Large elaenia                 | 1                       |
| <i>Eucometis penicillata</i>          | Gray-headed tanager           | 5                       |
| <i>Euscarthmus meloryphus</i>         | Fulvous-crowned scrub tyrant  | 3                       |
| <i>Fluvicola albiventer</i>           | Black-backed water tyrant     | 8                       |
| <i>Furnarius leucopus</i>             | Pale-legged hornero           | 13                      |
| <i>Furnarius rufus</i>                | Rufous hornero                | 20                      |
| <i>Hemitriccus margaritaceiventer</i> | Pearly-vented Tody-tyrant     | 1                       |
| <i>Hemitriccus striatcollis</i>       | Stripe-necked Tody-tyrant     | 5                       |
| <i>Herpsilochmus longirostris</i>     | Large-billed antwren          | 1                       |
| <i>Hylophilus pectoralis</i>          | Ashy-headed greenlet          | 3                       |
| <i>Hypocnemoides maculicauda</i>      | Band-tailed antbird           | 7                       |
| <i>Icterus cayanensis</i>             | Epaulet oriole                | 2                       |
| <i>Icterus croconotus</i>             | Orange-backed troupial        | 1                       |
| <i>Legatus leucophaeus</i>            | Piratic flycatcher            | 4                       |
| <i>Lepidocolaptes angustirostris</i>  | Narrow-billed woodcreeper     | 1                       |
| <i>Machetornis rixosa</i>             | Cattle tyrant                 | 5                       |
| <i>Molothrus oryzivorus</i>           | Giant cowbird                 | 1                       |
| <i>Myiarchus ferox</i>                | Short-crested flycatcher      | 6                       |
| <i>Myiophobus fasciatus</i>           | Bran-colored flycatcher       | 3                       |
| <i>Myiozetetes cayanensis</i>         | Rusty-margined flycatcher     | 5                       |
| <i>Paroaria capitata</i>              | Yellow-billed cardinal        | 36                      |
| <i>Pipra fasciicauda</i>              | Band-tailed manakin           | 7                       |
| <i>Pitangus sulphuratus</i>           | Great kiskadee                | 25                      |
| <i>Poecilatriccus latirostris</i>     | Rusty-fronted Tody-flycatcher | 8                       |
| <i>Progne tapera</i>                  | Brown-chested martin          | 1                       |
| <i>Pseudoseisura unirufa</i>          | Grey-crested cacholote        | 8                       |
| <i>Ramphocelus carbo</i>              | Silver-beaked tanager         | 101                     |
| <i>Saltator coerulescens</i>          | Bluish-gray saltator          | 18                      |

|                                  |                               |            |
|----------------------------------|-------------------------------|------------|
| <i>Sicalis flaveola</i>          | Saffron finch                 | 2          |
| <i>Sporophila angolensis</i>     | Chesnut-bellied finch         | 9          |
| <i>Sporophila coerulescens</i>   | Double-collared seedeater     | 1          |
| <i>Sporophila collaris</i>       | Rusty-collared seedeater      | 11         |
| <i>Sporophila lineola</i>        | Lined seedeater               | 1          |
| <i>Stelgidopteryx ruficollis</i> | Southern roughed-wing swallow | 3          |
| <i>Synallaxis albilora</i>       | White-lored spinetail         | 10         |
| <i>Taraba major</i>              | Great antshrike               | 4          |
| <i>Thraupis palmarum</i>         | Palm tanager                  | 1          |
| <i>Thraupis sayaca</i>           | Sayaca tanager                | 3          |
| <i>Thryothorus genibarbis</i>    | Moustached wren               | 1          |
| <i>Todirostrum cinereum</i>      | Common-Tody flycatcher        | 2          |
| <i>Turdus amaurochalinus</i>     | Creamy-bellied thrush         | 3          |
| <i>Turdus hauxwelli</i>          | Hauxwell's thrush             | 1          |
| <i>Turdus leucomelas</i>         | Pale-breasted thrush          | 8          |
| <i>Turdus rufiventris</i>        | Rufous-bellied thrush         | 7          |
| <i>Tyrannus melancholicus</i>    | Tropical kingbird             | 3          |
| <i>Vireo olivaceus</i>           | red-eyed vireo                | 1          |
| <i>Volatinia jacarina</i>        | Blue-black grassquit          | 3          |
| <b>Total</b>                     |                               | <b>500</b> |

**Table S2.** Conventional, nested and quantitative real-time PCR assays used in screening and molecular characterization for Anaplasmataceae agents targeting the 16S RNA, *groEL*, *dsb*, *gltA*, *sodB*, *omp-1*, *rpoB*, *ftsZ*, and *sucA* genes and intergenic region 23S-5S (ITS).

| Agent                                           | Target gene | Primer sequences (5'-3')                                                                 | PCR product size (pb) | Thermal protocol                                                                                                                        | Reference |
|-------------------------------------------------|-------------|------------------------------------------------------------------------------------------|-----------------------|-----------------------------------------------------------------------------------------------------------------------------------------|-----------|
| <i>Ehrlichia</i> spp./<br><i>Anaplasma</i> spp. | 16S<br>rRNA | EHR16SD<br>GGTCCYACAGAAAGTCC<br>EHRSR<br>TAGCACTCATCGTTTACAGC                            | 345                   | 95°C for 5 minutes;<br>40 cycles: 94°C for 1 minute, 54°C for 30 seconds and 72°C for 30 seconds and final extension 72°C for 5 minutes | [44]      |
| <i>Ehrlichia</i> spp.                           | <i>dsb</i>  | dsb-330<br>GATGATGTCTGAAGATATGAA<br>ACAAAT<br>dsb-728<br>CTGCTCGTCTATTTTACTTCTTA<br>AAGT | 409                   | 95°C for 2 minutes;<br>50 cycles: 95°C for 15 seconds, 58°C for 30 and 72°C for 30 seconds and final extension 72°C for 5 minutes       | [45]      |
| <i>Anaplasma</i> spp.                           | 16S<br>rRNA | AnaplsppF,<br>AGAAGAAGTCCCGGCAAAC<br>AnapIR<br>3GAGACGACTTTTACGGATTAG<br>CTC             | 800                   | 94°C for 3 minutes;<br>30 cycles: 94°C for 30 seconds, 50°C for 30 and 72°C for 1 minute and final extension 72°C for 10 minutes        | [50]      |
| <i>Anaplasma</i> spp./ <i>Ehrlichia</i> spp.    | 16S<br>rRNA | AE1-F<br>AAGCTTAACACATGCAAGTCG<br>AA<br>AE1-R<br>AGTCACTGACCCAACCTTAAA<br>TG             | 1406                  | 94°C for 3 minutes;<br>35 cycles: 94°C for 30 seconds, 59°C for 30 seconds and 72°C for                                                 | [20]      |

|                                              |              |                                                                                                                                                                                                                                                         |                  |  |                                                                                                                                                                                                                                                                                      |      |
|----------------------------------------------|--------------|---------------------------------------------------------------------------------------------------------------------------------------------------------------------------------------------------------------------------------------------------------|------------------|--|--------------------------------------------------------------------------------------------------------------------------------------------------------------------------------------------------------------------------------------------------------------------------------------|------|
|                                              |              |                                                                                                                                                                                                                                                         |                  |  | 1 minute and final extension 72°C for 5 minutes                                                                                                                                                                                                                                      |      |
| <i>Ehrlichia</i> spp.                        | <i>omp-1</i> | conP28-F1<br>AT(C/T)AGTG(G/C)AAA(AG)TA(T/C)(A/G)T<br>(G/A)CCAA<br>conP28-R1<br>TTA(G/A)AA(A/G)G(C/T)AAA(C/T) CT(T/G)CCTCC<br>conP28-F2<br>CAATGG(A/G)(T/A)GG(T/C)CC(A/C)AGA (A/G)TAG<br>conP28-R2<br>TTCC(T/C)TG<br>(A/G)TA(A/G)G(A/C)AA(T/G)TTT<br>AGG | 700              |  | 94°C for 3 minutes;<br>30 cycles: 94°C for 1 minute, 50°C for 1 minute and 72°C for 1 minute and final extension 72°C for 5 minutes                                                                                                                                                  | [49] |
| <i>Ehrlichia</i> spp.                        | <i>sodB</i>  | sodbEhr1600-F<br>ATGTTTACTTTACCTGAACCTTC<br>CATATC<br>sodbEhr1600-R<br>ATCTTTGAGCTGCAAAATCCCA<br>ATT                                                                                                                                                    | 600              |  | 94°C for 3 minutes;<br>55 cycles: 94°C for 10 seconds, 58°C for 10 seconds and 72°C for 15 seconds, extension 72°C for 30 seconds and final extension 72°C for 5 minutes                                                                                                             | [48] |
| <i>Anaplasma</i> spp./ <i>Ehrlichia</i> spp. | <i>gltA</i>  | F4b<br>CCGGGTTTTATGTCTACTGC<br>Rb1<br>CGATGACCAAAACCCAT<br>EHR-CS136F<br>TTYATGTCYACTGCTGCKTG<br>EHR-778R<br>GCNCCMCCATGMGCTGG                                                                                                                          | 800<br><br>650   |  | 95°C for 5 minutes;<br>40 cycles: 95°C for 30 seconds, 55°C for 30 seconds and 72°C for 1 minutes and final extension 72°C for 10 minutes                                                                                                                                            | [47] |
| <i>Ehrlichia</i> spp.                        | 16S rRNA     | Eh_16S21F1<br>GGCTCAGAACGAACGCTGG<br>Eh-16S 1494 R1<br>AGCCGCAGGTTCACCTACA<br>EH 16S 31F2<br>GAACGCTGGCGGCAAGCC<br>EH 16S 1467 R2<br>GTTACGACTTCACCMTAGTCA                                                                                              | 1474<br><br>1437 |  | 95°C for 5 minutes;<br>34 cycles: 95°C for 30 seconds, 55°C for 30 seconds and 72°C for 1 minutes and final extension 72°C for 10 minutes<br>94°C for 3 minutes;<br>45 cycles: 94°C for 30 seconds, 55°C for 1 minute and 72°C for 1 minute and final extension 72°C for 10 minutes. | [46] |
| <i>Ehrlichia</i> spp.                        | <i>gltA</i>  | Eh_gltA112 F1<br>GGRRTRTTAACTTATGATCCAGG<br>Eh_gltA686 R1<br>GCATTYTGATCATGATCAGCATG<br>Eh_gltA137 F2<br>TTATGTCTACTGCTGCTTGTGA                                                                                                                         | 575              |  | * Same thermal conditions for the second reaction.                                                                                                                                                                                                                                   | [46] |

|                       |              |                            |     |                        |          |
|-----------------------|--------------|----------------------------|-----|------------------------|----------|
| <i>Ehrlichia</i> spp. | <i>rpoB</i>  | Eh_gltA614 R2              | 478 |                        |          |
|                       |              | TARGAAGAAAYRTCAAACATCATATG |     |                        |          |
|                       |              | Eh_rpoB241 F1              |     |                        |          |
|                       |              | AGTTATAGTATTGGTGARCCRC     | 581 |                        |          |
| <i>Ehrlichia</i> spp. | <i>rpoB</i>  | A                          |     |                        |          |
|                       |              | Eh_rpoB821 R1              |     |                        |          |
|                       |              | ARYCTAACWCCYCTRAAYCTAT     |     | 94°C for 3 minutes;    | [46]     |
|                       |              | C                          |     | 45 cycles: 94°C for    |          |
| <i>Ehrlichia</i> spp. | <i>rpoB</i>  | Eh_rpoB305 F2              | 319 | 30 seconds, 55°C       |          |
|                       |              | CTGTWCCTATACGTATAGTKYT     |     | for 1 minute and 72°C  |          |
|                       |              | GCG                        |     | for 1 minute and final |          |
|                       |              | Eh_rpoB623 R2              |     | extension 72°C for 10  |          |
| <i>Ehrlichia</i> spp. | <i>rpoB</i>  | TCTARCCAKGAWCCYCTRARG      |     | minutes.               |          |
|                       |              | G                          |     | * Same thermal         |          |
|                       |              |                            |     | conditions for the     |          |
|                       |              |                            |     | second reaction.       |          |
| <i>Ehrlichia</i> spp. | <i>ftsZ</i>  | Eh_ftsZ242 F1              | 462 |                        |          |
|                       |              | GTARAGGWGCWGCWGAAGAR       |     | 94°C for 3 minutes;    | [46]     |
|                       |              | TCAA                       |     | 45 cycles: 94°C for    |          |
|                       |              | Eh_ftsZ703 R1              |     | 30 seconds, 55°C       |          |
| <i>Ehrlichia</i> spp. | <i>ftsZ</i>  | CWGCTTCTCCTGTRCCCATCAT     |     | for 1 minute and 72°C  |          |
|                       |              | Eh_ftsZ313 F2              |     | for 1 minute and final |          |
|                       |              | ACTGCGYGAATGGGTGGWGA       | 367 | extension 72°C for 10  |          |
|                       |              | Eh_ftsZ679 R2              |     | minutes.               |          |
| <i>Ehrlichia</i> spp. | <i>ftsZ</i>  | TTTRCCCATYTCRCTCATTATTG    |     | * Same thermal         |          |
|                       |              | C                          |     | conditions for the     |          |
|                       |              |                            |     | second reaction.       |          |
|                       |              |                            |     |                        |          |
| <i>Ehrlichia</i> spp. | <i>groEL</i> | Eh_groEL64 F1              |     |                        |          |
|                       |              | TTRGAAGAYGCWGTAGGATGYAC    | 530 |                        |          |
|                       |              | Eh_groEL593 R1             |     |                        |          |
|                       |              | CCWCKRTCAAAYTGCATRCCATC    | 235 |                        |          |
| <i>Ehrlichia</i> spp. | <i>groEL</i> | Eh_groEL107 F2             |     |                        |          |
|                       |              | CYGTAGCWATTRGYAARYCYTATGG  |     | 94°C for 3 minutes;    |          |
|                       |              | Eh_groEL341 R2             |     | 45 cycles: 94°C for    |          |
|                       |              | CWNAYAATATCTGCHCCAGCAGC    |     | 30 seconds, 55°C       |          |
| <i>Ehrlichia</i> spp. | <i>groEL</i> |                            |     | for 1 minute and 72°C  |          |
|                       |              |                            |     | for 1 minute and final |          |
|                       |              |                            |     | extension 72°C for 10  |          |
|                       |              |                            |     | minutes.               |          |
| <i>Ehrlichia</i> spp. | <i>groEL</i> |                            |     | * Same thermal         |          |
|                       |              |                            |     | conditions for the     |          |
|                       |              |                            |     | second reaction.       |          |
|                       |              |                            |     |                        |          |
| <i>Ehrlichia</i> spp. | <i>groEL</i> | Ehrli-gro67F               |     |                        | [46, 50] |
|                       |              | GAAGATGCWGTWGGWTGTACKGC    | 710 | 94°C for 3 minutes;    |          |
|                       |              | Ehrli-gro776R              |     | 45 cycles: 94°C for    |          |
|                       |              | AGMGCTTCWCCTTCWACRTCCTC    | 365 | 30 seconds, 55°C       |          |
| <i>Ehrlichia</i> spp. | <i>groEL</i> | Ehrli-gro217F              |     | for 1 minute and 72°C  |          |
|                       |              | ATTACTCAGAGTGCTTCTCARTG    |     | for                    |          |
|                       |              | Ehrli-gro581R              |     | 1 minute               |          |
|                       |              | TGCATACCRTCAGTYTTTTCAAC    |     | final extension 72°C   |          |
| <i>Ehrlichia</i> spp. | <i>groEL</i> |                            |     | for 10 minutes         |          |
|                       |              |                            |     | * Same thermal         |          |
|                       |              |                            |     | conditions for the     |          |
|                       |              |                            |     | second reaction.       |          |

|                                                                                                                                    |               |                                                                                                                                                |                        |                                                                                                                                                                                                                                                                                                                                    |              |
|------------------------------------------------------------------------------------------------------------------------------------|---------------|------------------------------------------------------------------------------------------------------------------------------------------------|------------------------|------------------------------------------------------------------------------------------------------------------------------------------------------------------------------------------------------------------------------------------------------------------------------------------------------------------------------------|--------------|
| <i>Anaplasma</i><br><b>spp.</b>                                                                                                    | 16S<br>rRNA   | 16SF<br>GCGATTTTAGAGTGYGGAGATTG<br>16SR<br>TACAATACCGGAGTAAAAGTCAA                                                                             | 1133                   | 94°C for 3 minutes;<br>40 cycles: 94°C for<br>30 seconds, 56°C<br>for 1 minute and 72°C<br>for<br>1 minute.<br>final extension 72°C<br>for 10 minutes                                                                                                                                                                              | [52, 53]     |
| <i>Anaplasma</i><br><b>spp.</b>                                                                                                    | 16 S<br>rRNA  | AE4-Fw<br>GTACCYAYAGAAGAAGTCCCCG<br>GCA<br>AE-Rv<br>RCACCAGCTTCGAGTTAAGCCA<br>AT<br>GE2F2<br>GTTAGTGGCAGACGGGTGAGT                             | 800                    | 98°C for 3 minutes;<br>40 cycles: 98°C for<br>55 seconds, 57.5°C<br>for 20 seconds and<br>72°C for 40 seconds<br>final extension 72°C<br>for 5 minutes<br><br>* Same thermal<br>conditions for the<br>second reaction.                                                                                                             | [54, 44, 55] |
| <i>Anaplasma</i><br><b>spp.</b>                                                                                                    | <i>groEL</i>  | GROESL1F<br>TATAGCTAGCATAATTACCCAGAGC<br>GROESL1R<br>GGTTAGTTCTGCTTTCGATGC<br>GROESL2F<br>TTATGTCTATGCGCCGTG<br>GROESL2R<br>CGGACCTTGCCACATTTT | 842<br><br><br><br>339 | 94°C for 3 minutes;<br>30 cycles: 94°C for<br>30 seconds, 55°C<br>for 30 seconds and<br>72°C for 1.5 minutes<br>final extension 72°C<br>for 10 minutes<br><br>2ª reação<br><br>94°C for 3 minutes;<br>30 cycles: 94°C for<br>30 seconds, 55°C<br>for 30 seconds and<br>72°C for 1 minute<br>final extension 72°C<br>for 10 minutes | [57]         |
| <i>Anaplasma</i><br><b>spp.</b>                                                                                                    | ITS<br>23S-5S | ITSiF<br>ATACCTCTGGTGTACCAGTTG<br><br>ITSiR<br>TTAACTT- CCGGGTTCGGAATG                                                                         | 300                    | 94°C for 2 minutes;<br>35 cycles: 94°C for<br>30 seconds, 58°C<br>for 30 seconds and<br>72°C for 1 minute<br>final extension 72°C<br>for 5 minutes                                                                                                                                                                                 | [56]         |
| <i>'Candidatus</i><br><i>Alloccryptopla</i><br><i>sma spp.'</i><br><i>'Candidatus</i><br><i>Alloccryptopla</i><br><i>sma spp.'</i> | <i>sucA</i>   | Crypto_sucA_F1<br>GTTATGGGNNTTGAGTAYGG<br>Crypto_sucA_R2<br>GGGCTCTTCYTGRACCA                                                                  | 636                    | 93°C for 3 minutes;<br>35 cycles: 93°C for<br>30 seconds, 52°C<br>For 1 minute and<br>72°C for 1 minute<br>final extension 72°C<br>for 5 minutes                                                                                                                                                                                   | [4]          |
|                                                                                                                                    | <i>groEL</i>  | Crypto_GroEL_F1<br>CCTTCYTCAACAGCAGCYCTAG<br>Crypto_GroEL_R2<br>ACNGTTGAAGARAGTAARGG                                                           | 713                    |                                                                                                                                                                                                                                                                                                                                    |              |

**Table S3.** Avian DNA samples positive in the multiplex quantitative (q) real-time qPCR for *Anaplasma* spp. and *Ehrlichia* spp. based on the *groEL* gene.

| Sample ID  | Avian species                 | Sampling site               | State              | Agent detected        | Cq    |
|------------|-------------------------------|-----------------------------|--------------------|-----------------------|-------|
| 4 BAP413   | <i>Certhiaxis cinnamomeus</i> | Nossa Senhora do Livramento | Mato Grosso        | <i>Anaplasma</i> spp. | 38.32 |
| 51SL 025   | <i>Eucometis penicillata</i>  | Santo Antonio de Leverger   | Mato Grosso        | <i>Anaplasma</i> spp. | 38.30 |
| 70 BEP393  | <i>Thraupis sayaca</i>        | Corumbá                     | Mato Grosso do Sul | <i>Anaplasma</i> spp. | 37.78 |
| 78 F002    | <i>Leptotila verreauxi</i>    | Santo Antonio de Leverger   | Mato Grosso        | <i>Anaplasma</i> spp. | 37.61 |
| 81 BAP435  | <i>Cantorchilus leucotis</i>  | Nossa Senhora do Livramento | Mato Grosso        | <i>Anaplasma</i> spp. | 36.89 |
| 167 BEP304 | <i>Ramphocelus carbo</i>      | Corumbá                     | Mato Grosso do Sul | <i>Anaplasma</i> spp. | 38.68 |
| 191 BEP340 | <i>Tigrisoma lineatum</i>     | Corumbá                     | Mato Grosso do Sul | <i>Anaplasma</i> spp. | 39.22 |
| 208 BAP04  | <i>Ramphocelus carbo</i>      | Poconé                      | Mato Grosso        | <i>Anaplasma</i> spp. | 37.79 |
| 232 BAP87  | <i>Legatus leucophaius</i>    | Poconé                      | Mato Grosso        | <i>Anaplasma</i> spp. | 37.95 |
| 244 BAP112 | <i>Cacicus cela</i>           | Poconé                      | Mato Grosso        | <i>Anaplasma</i> spp. | 28.94 |
| 264        | <i>Ramphocelus carbo</i>      | Poconé                      | Mato Grosso        | <i>Anaplasma</i> spp. | 39.24 |
| 266 BAP65  | <i>Sporophila angolensis</i>  | Poconé                      | Mato Grosso        | <i>Anaplasma</i> spp. | 39.24 |
| 281 BAP118 | <i>Saltator coerulescens</i>  | Poconé                      | Mato Grosso        | <i>Anaplasma</i> spp. | 38.50 |
| 286 BAP42  | <i>Ramphocelus carbo</i>      | Poconé                      | Mato Grosso        | <i>Anaplasma</i> spp. | 35.73 |
| 288 BAP128 | <i>Ramphocelus carbo</i>      | Poconé                      | Mato Grosso        | <i>Anaplasma</i> spp. | 38.22 |
| 299 BAP15  | <i>Certhiaxis cinnamomeus</i> | Poconé                      | Mato Grosso        | <i>Ehrlichia</i> spp  | 37.31 |

|               |                               |                             |             |                       |       |
|---------------|-------------------------------|-----------------------------|-------------|-----------------------|-------|
| 318           | <i>Furnarius rufus</i>        | Nossa Senhora do Livramento | Mato Grosso | <i>Ehrlichia</i> spp  | 37.52 |
| <b>BAP254</b> |                               |                             |             |                       |       |
| 332           | <i>Pitangus sulphuratus</i>   | Nossa Senhora do Livramento | Mato Grosso | <i>Anaplasma</i> spp. | 39.43 |
| <b>BAP335</b> |                               |                             |             |                       |       |
| 333           | <i>Sporophila collaris</i>    | Nossa Senhora do Livramento | Mato Grosso | <i>Anaplasma</i> spp. | 37.40 |
| <b>BAP257</b> |                               |                             |             |                       |       |
| 337           | <i>Agelasticus cyanopus</i>   | Nossa Senhora do Livramento | Mato Grosso | <i>Anaplasma</i> spp. | 37.14 |
| <b>BAP330</b> |                               |                             |             |                       |       |
| 350           | <i>Busarellus nigricollis</i> | Nossa Senhora do Livramento | Mato Grosso | <i>Anaplasma</i> spp. | 36.53 |
| <b>BAP143</b> |                               |                             |             |                       |       |
| 356           | <i>Chloroceryle americana</i> | Nossa Senhora do Livramento | Mato Grosso | <i>Anaplasma</i> spp. | 36.86 |
| <b>BAP262</b> |                               |                             |             |                       |       |
| 361           | <i>Agelasticus cyanopus</i>   | Nossa Senhora do Livramento | Mato Grosso | <i>Anaplasma</i> spp. | 35.50 |
| <b>BAP332</b> |                               |                             |             |                       |       |
| 365           | <i>Tyrannus melancholicus</i> | Nossa Senhora do Livramento | Mato Grosso | <i>Anaplasma</i> spp. | 34.57 |
| <b>BAP220</b> |                               |                             |             |                       |       |
| 384           | <i>Guira guira</i>            | Nossa Senhora do Livramento | Mato Grosso | <i>Anaplasma</i> spp. | 35.96 |
| <b>BAP139</b> |                               |                             |             |                       |       |
| 388           | <i>Paroaria capitata</i>      | Nossa Senhora do Livramento | Mato Grosso | <i>Anaplasma</i> spp. | 37.21 |
| <b>BAP263</b> |                               |                             |             |                       |       |
| 400 SL80      | <i>Icterus cayanensis</i>     | Santo Antonio de Leverger   | Mato Grosso | <i>Anaplasma</i> spp. | 36.68 |
| 403 F14       | <i>Leptotila verreauxi</i>    | Santo Antonio de Leverger   | Mato Grosso | <i>Anaplasma</i> spp. | 36.82 |
| 417 F73       | <i>Ramphocelus carbo</i>      | Santo Antonio de Leverger   | Mato Grosso | <i>Anaplasma</i> spp. | 38.20 |
| 423 F40       | <i>Leptotila verreauxi</i>    | Santo Antonio de Leverger   | Mato Grosso | <i>Anaplasma</i> spp. | 38.12 |
| 436 F86       | <i>Ramphocelus carbo</i>      | Santo Antonio de Leverger   | Mato Grosso | <i>Anaplasma</i> spp. | 36.89 |
| 461 F56       | <i>Pitangus sulphuratus</i>   | Santo Antonio de Leverger   | Mato Grosso | <i>Anaplasma</i> spp. | 36    |
| 463 F67       | <i>Pipra fasciicauda</i>      | Santo Antonio de Leverger   | Mato Grosso | <i>Anaplasma</i> spp. | 36.53 |
| 480 SL32      | <i>Cranioleuca vulpina</i>    | Santo Antonio de Leverger   | Mato Grosso | <i>Anaplasma</i> spp. | 34.66 |

|          |                               |                           |             |                       |       |
|----------|-------------------------------|---------------------------|-------------|-----------------------|-------|
| 487 SL42 | <i>Phaethornis nattereri</i>  | Santo Antonio de Leverger | Mato Grosso | <i>Anaplasma</i> spp. | 35.82 |
| 489 F27  | <i>Basileuterus flaveolus</i> | Santo Antonio de Leverger | Mato Grosso | <i>Anaplasma</i> spp. | 39.05 |
| 496 F42  | <i>Ramphocelus carbo</i>      | Santo Antonio de Leverger | Mato Grosso | <i>Anaplasma</i> spp. | 33.46 |
| 498 SL57 | <i>Dendroplex picus</i>       | Santo Antonio de Leverger | Mato Grosso | <i>Anaplasma</i> spp. | 33.47 |
|          |                               |                           |             | <i>Ehrlichia</i> spp. | 33.24 |
| 516 F50  | <i>Ramphocelus carbo</i>      | Santo Antonio de Leverger | Mato Grosso | <i>Anaplasma</i> spp. | 33.40 |
|          |                               |                           |             | <i>Ehrlichia</i> spp. | 37.89 |

**Table S4.** BLAST analyses results obtained for 16S rRNA, *dsb*, and ITS sequences obtained in PCR protocols for Anaplasmataceae agents from avian blood samples from the Brazilian Pantanal.

| Sample ID | Bird species/<br>Locality                                                         | Molecular marker | Sequence size (bp) | Query cover (%) | E-value                   | Identity (%) | Best Match            | Host                      | Accession number | Country  | Reference of PCR protocol used |
|-----------|-----------------------------------------------------------------------------------|------------------|--------------------|-----------------|---------------------------|--------------|-----------------------|---------------------------|------------------|----------|--------------------------------|
| 264       | <i>Ramphocelus carbo</i><br>(BAP123),<br>Poconé<br>Mato Grosso.                   | 16S rRNA         | 209                | 100             | 1.00<br>E <sup>-96</sup>  | 98.58        | <i>Ehrlichia</i> spp. | <i>Amblyomma sculptum</i> | MT514732         | Brazil   | [44]                           |
| 292       | <i>Elaenia albiceps</i><br>(BAP72)<br>Poconé,<br>Mato Grosso                      | 16S rRNA         | 249                | 100             | 2.00<br>E <sup>-139</sup> | 99.65        | <i>Ehrlichia</i> spp. | <i>Erinaceus amurens</i>  | MH879869         | China    | [44]                           |
| 441       | <i>Pitangus sulphuratus</i><br>(F10)<br>Santo Antonio de Leverger,<br>Mato Grosso | 16S rRNA         | 205                | 100             | 1.00<br>E <sup>-96</sup>  | 99.51        | <i>Anaplasma</i> spp. | <i>Amblyomma hebraeum</i> | MG351089         | Eswatini | [44]                           |



|     |                                                                                           |             |     |     |                           |       |                                                    |                                |              |               |      |
|-----|-------------------------------------------------------------------------------------------|-------------|-----|-----|---------------------------|-------|----------------------------------------------------|--------------------------------|--------------|---------------|------|
| 444 | <i>Ramphocelus carbo</i><br>(F68)<br><br>Santo Antonio de Leverger,<br><br>Mato Grosso    | 16S<br>rRNA | 281 | 100 | 2.00<br>E <sup>-139</sup> | 100   | <i>Ehrlichia</i><br><br>spp.                       | <i>Haemaphysalis elliptica</i> | MZ35109<br>2 | Eswatini      | [44] |
| 330 | <i>Crax fasciolata</i><br>(BAP146)<br><br>Nossa Senhora do Livramento,<br><br>Mato Grosso | 16S<br>rRNA | 269 | 100 | 2.00<br>E <sup>-128</sup> | 98.88 | <i>Anaplasma</i><br><br>spp.                       | <i>Amblyomma dissimile</i>     | MG4372<br>72 | Brazil        | [44] |
| 330 | <i>Crax fasciolata</i><br>(BAP146)<br><br>Nossa Senhora do Livramento,<br><br>Mato Grosso | 16S<br>rRNA | 884 | 100 | 0<br>E <sup>-127</sup>    | 98.6  | ' <i>Candidatus</i><br><i>Alloorytoplasma</i> sp.' | <i>Lacerta viridis</i>         | MG9249<br>04 | Slovakia      | [54] |
| 330 | <i>Crax fasciolata</i><br>(BAP146)<br><br>Nossa Senhora do Livramento,<br><br>Mato Grosso | 16S<br>rRNA | 908 | 100 | 0                         | 99.56 | ' <i>Candidatus</i><br><i>Alloorytoplasma</i> sp.' | <i>Amblyomma coelebs</i>       | OQ72483<br>9 | French Guyana |      |
| 330 | <i>Crax fasciolata</i><br>(BAP146)<br><br>Nossa Senhora do Livramento,<br><br>Mato Grosso | 16S<br>rRNA | 908 | 100 | 0                         | 99.56 | ' <i>Candidatus</i><br><i>Alloorytoplasma</i> sp.' | <i>Amblyomma coelebs</i>       | OR85427<br>0 | French Guyana |      |

|     |                                                                                              |             |     |     |   |       |                             |                              |          |                  |      |
|-----|----------------------------------------------------------------------------------------------|-------------|-----|-----|---|-------|-----------------------------|------------------------------|----------|------------------|------|
| 341 | <i>Furnarius leucopus</i><br>(BAP428)<br>Nossa Senhora do Livramento,<br>Mato Grosso         | 16S<br>rRNA | 832 | 100 | 0 | 98.9  | <i>Anaplasma</i> sp.        | <i>Haemaphysalis parvata</i> | OQ092428 | Uganda           | [54] |
|     |                                                                                              |             |     | 100 | 0 | 99.3  | <i>Anaplasma</i> sp.        | <i>Amblyoma tholloni</i>     | OQ092427 | Uganda           |      |
| 345 | <i>Aurindinicola leucocephala</i><br>(BAP267)<br>Nossa Senhora do Livramento,<br>Mato Grosso | 16S<br>rRNA | 832 | 100 | 0 | 97.4  | <i>Ehrlichia</i> sp.        | <i>Dasyurus geoffroyi</i>    | MW633161 | Australia        | [54] |
|     |                                                                                              |             |     | 100 | 0 | 97.3  | <i>Ehrlichia</i> sp.        | <i>Ixodes auritulus</i>      | MW628650 | Uruguay          |      |
| 389 | <i>Ageslastycus cyanopus</i><br>(BAP289)<br>Nossa Senhora do Livramento,<br>Mato Grosso      | <i>dsb</i>  | 401 | 99  | 0 | 99    | <i>Ehrlichia minasensis</i> | <i>Bradypus variegatus</i>   | MT212414 | Rondônia, Brazil | [54] |
| 418 | <i>Basileuterus flaveolus</i><br>(F54)<br>Poconé,<br>Mato Grosso                             | <i>dsb</i>  | 402 | 100 | 0 | 99.25 | <i>E. minasensis</i>        | <i>B. variegatus</i>         | MT212414 | Rondônia, Brazil | [54] |

|     |                                             |                         |     |     |                    |       |                                  |                                 |          |             |      |
|-----|---------------------------------------------|-------------------------|-----|-----|--------------------|-------|----------------------------------|---------------------------------|----------|-------------|------|
| 330 | <i>Crax fasciolata</i><br>(BAP146)          | 23S-5S<br>rRNA<br>(ITS) | 261 | 100 | 6E <sup>-84</sup>  | 89.53 | <i>Anaplasma phagocytophilum</i> | <i>Scelosporus occidentalis</i> | JF487930 | USA         | [56] |
|     | Nossa Senhora do Livramento,<br>Mato Grosso |                         |     | 73  | 1E <sup>-61</sup>  | 90.10 | <i>Anaplasma marginale</i>       | <i>Bos taurus</i>               | CP023731 | Brazil      |      |
| 497 | <i>Saltator coerulescens</i><br>(F58)       | 23S-5S<br>rRNA<br>(ITS) | 270 | 77  | 5E <sup>-55</sup>  | 86.19 | <i>A. phagocytophilum</i>        | <i>Ovis aries</i>               | CP015376 | Norway      | [56] |
|     | Santo Antonio de Leverger,<br>Mato Grosso   |                         |     | 88  | 5E <sup>-55</sup>  | 86.19 | <i>A. phagocytophilum</i>        | <i>Homo sapiens</i>             | CP035303 | South Korea |      |
| 507 | <i>Basileuterus flaveolus</i><br>(F12)      | 23S-5S<br>rRNA<br>(ITS) | 267 | 89  | 4E <sup>-101</sup> | 91    | <i>A. phagocytophilum</i>        | <i>S. occidentalis</i>          | JF487930 | USA         | [56] |
|     | Nossa Senhora do Livramento,<br>Mato Grosso |                         |     | 100 | 33E <sup>-77</sup> | 83.84 | <i>A. marginale</i>              | <i>B. taurus</i>                | CP023731 | Brazil      |      |
